# Supplementary material
Source: publisher figshare collection journal article supplement (https://acs.figshare.com/ndownloader/files/4607302)
Supplement: Supplementary file 1 [file 4607302]

## Supporting Information

### Fabrication of Superhydrophobic Surfaces with Hierarchical Structure through Solution-Immersion Process on Copper and Galvanized Iron Substrates

Wenguo Xu, Hongqin Liu, Shixiang Lu, Jinming Xi and Yanbin Wang

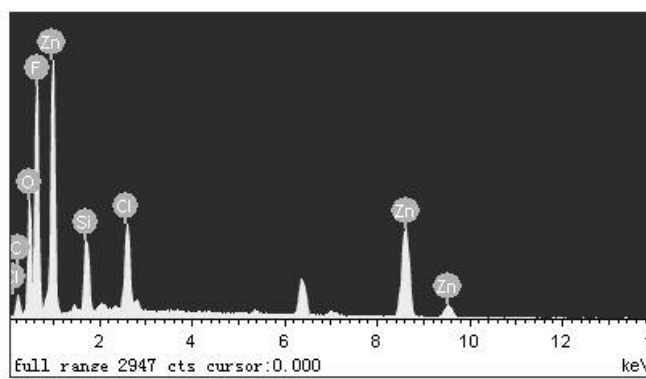

**Figure S1.** The EDX spectrum of the distributed elements for the superhydrophobic film on galvanized iron substrate.
